# Supplementary material for: A Prospective Population Pharmacokinetic Analysis of Sapropterin Dihydrochloride in Infants and Young Children with Phenylketonuria
Source: Springer Nature journal article supplement (doi:10.1007/s40262-014-0196-4), 2014-10-22
Supplement: MOESM1 [file 9340870]

**A Prospective Population Pharmacokinetic Analysis of Sapropterin Dihydrochloride in  
Infants and Young Children with Phenylketonuria**

Yulan Qi,<sup>1</sup> Diane R. Mould,<sup>2</sup> Huiyu Zhou,<sup>1</sup> Markus Merilainen,<sup>1</sup> Donald G. Musson<sup>1\*</sup>

1 BioMarin Pharmaceutical Inc., Novato, California, USA

2 Projections Research Inc., Phoenixville, Pennsylvania, USA

\* Corresponding author.

**ELECTRONIC SUPPLEMENTARY MATERIAL**

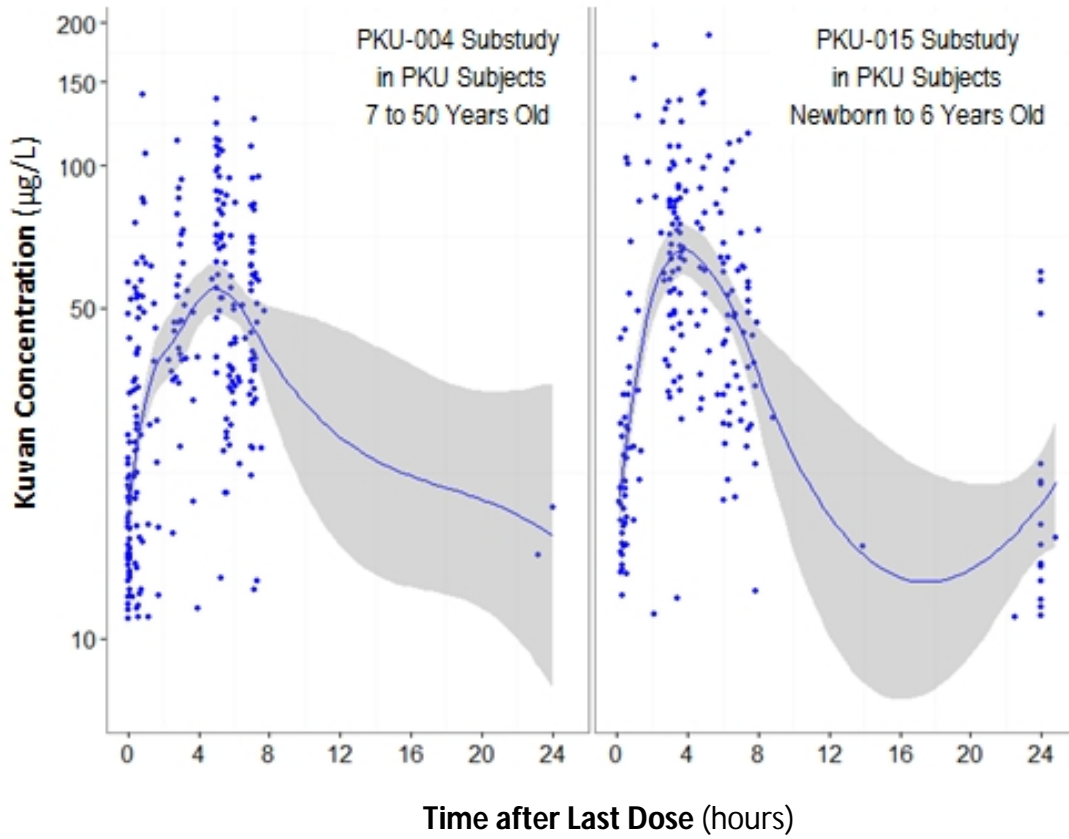

**Figure 1S.** Concentration-Time Curves, by Study (Population PK Substudy).

**Table 1S.** List of Covariates Assessed in the Population PK Analysis of Sapropterin.

| <b>Covariate</b>                      | <b>Abbreviation</b> | <b>Unit</b>       | <b>Value</b>                                         | <b>Type</b> |
|---------------------------------------|---------------------|-------------------|------------------------------------------------------|-------------|
| Subject Age at baseline               | AGE                 | yr                | Numeric                                              | Ratio       |
| Subject Weight                        | WT                  | kg                | Numeric                                              | Ratio       |
| Subject Height at baseline            | HT                  | cm                | Numeric                                              | Ratio       |
| Subject body surface area at baseline | BSA                 | m <sup>2</sup>    | Numeric                                              | Ratio       |
| Body mass index at baseline           | BMI                 | kg/m <sup>2</sup> | Numeric                                              | Ratio       |
| Subject Gender                        | SEX                 | ---               | 1=female<br>0=male                                   | Categorical |
| Subject Race                          | RACE                | ---               |                                                      | Categorical |
| Subject Ethnicity                     | ETHN                |                   | 0 = Not Hispanic or Latino<br>1 = Hispanic or Latino | Categorical |
| Renal Function:                       |                     |                   |                                                      |             |
| Creatinine Clearance                  | CLCR                | mL/min            | Numeric                                              | Ratio       |
| Hepatic Function:                     |                     |                   |                                                      |             |
| Total Bilirubin                       | TBIL                | mg/dL             | Numeric                                              | Ratio       |
| Alanine aminotransaminase             | ALT                 | IU/L              | Numeric                                              | Ratio       |
| Asparagine aminotransaminase          | AST                 | IU/L              | Numeric                                              | Ratio       |
| Disease                               |                     |                   |                                                      |             |
| Phenylalanine                         | PHE                 | ng/mL             | Numeric                                              | Ratio       |

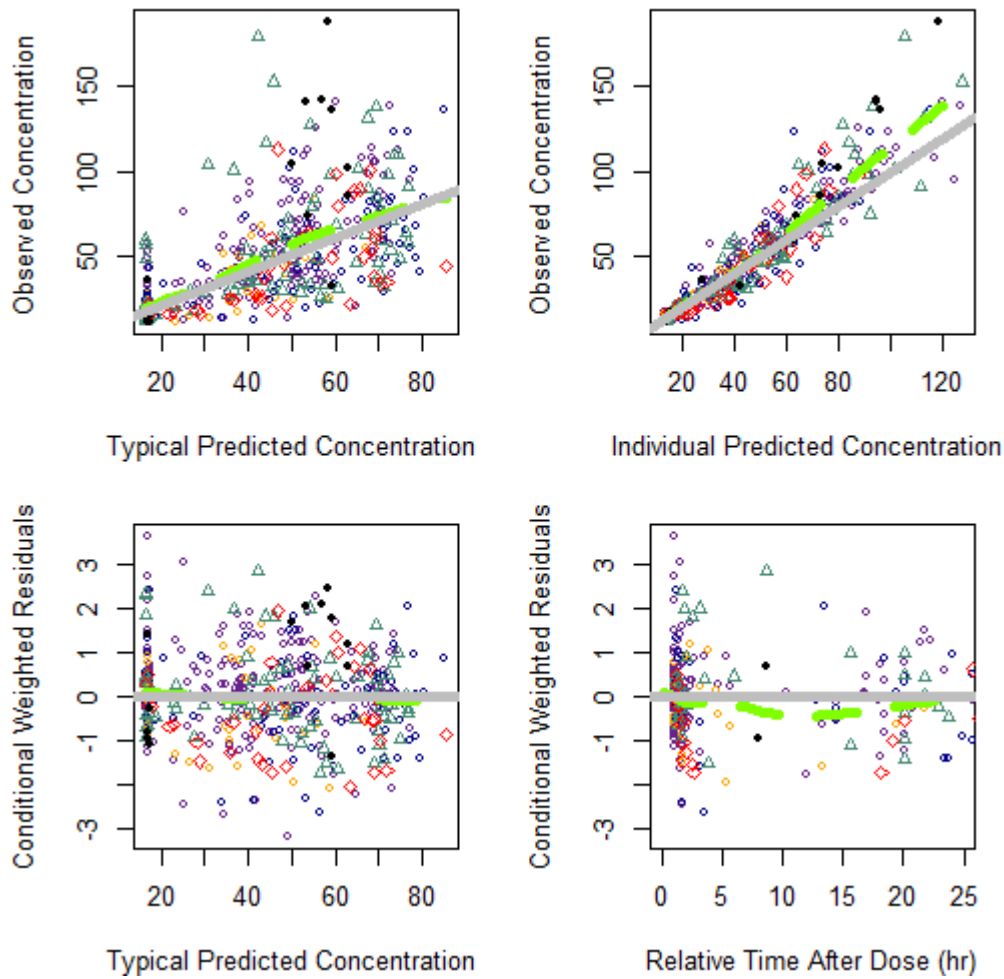

**Figure 2S.** Basic goodness of fit plots for the final model. Age <1 black filled circles; Age 1 to <2 red open diamonds; Age 2 to <4 aquamarine open triangles; Age 4 to <7 blue open circles; Age 7 to ≤12 orange open diamonds; Age >12 purple open circles; line of unity or identity solid grey line, lowess smooth dashed green line.

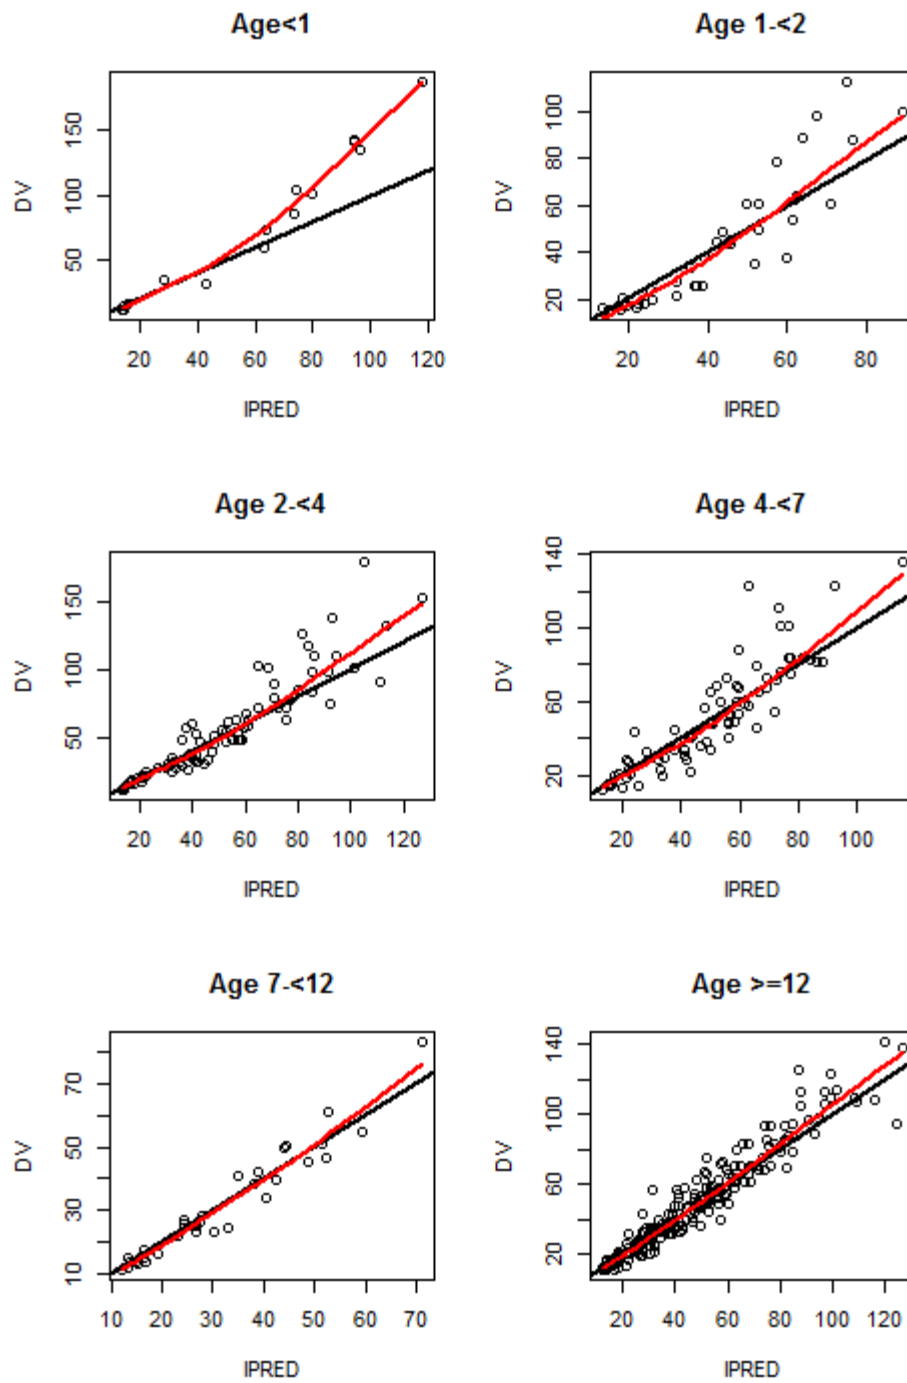

**Figure 3S.** Observed value (DV) versus individual predicted value (IPRED) by age group. Black line, identity line; red line, lowess smooth line.

**Table 2S.** Effect of weight on clearance and volume of distribution

| <b>Weight (kg)</b> | <b>CL/F<br/>(L/hour)</b> | <b>Percent of<br/>Reference</b> | <b>V/F (L)</b> | <b>Percent of<br/>Reference</b> |
|--------------------|--------------------------|---------------------------------|----------------|---------------------------------|
| 5                  | 277.15                   | 10.23                           | 551.95         | 18.28                           |
| 15                 | 716.06                   | 26.42                           | 1119.87        | 37.08                           |
| 25                 | 1113.33                  | 41.08                           | 1556.10        | 51.53                           |
| 35                 | 1488.95                  | 54.94                           | 1932.61        | 63.99                           |
| 45                 | 1850.04                  | 68.27                           | 2272.13        | 75.24                           |
| 55                 | 2200.28                  | 81.19                           | 2585.58        | 85.62                           |
| 65                 | 2541.92                  | 93.80                           | 2879.25        | 95.34                           |
| 70 <sup>a</sup>    | 2710.00                  | 100.00                          | 3020.00        | 100.00                          |
| 75                 | 2876.45                  | 106.14                          | 3157.21        | 104.54                          |
| 85                 | 3204.96                  | 118.26                          | 3422.23        | 113.32                          |
| 95                 | 3528.24                  | 130.19                          | 3676.36        | 121.73                          |
| 105                | 3846.91                  | 141.95                          | 3921.12        | 129.84                          |
| 115                | 4161.48                  | 153.56                          | 4157.70        | 137.67                          |
| 125                | 4472.34                  | 165.03                          | 4387.06        | 145.27                          |
| 135                | 4779.84                  | 176.38                          | 4609.98        | 152.65                          |
| 145                | 5084.25                  | 187.61                          | 4827.08        | 159.84                          |

a 70 kg is the reference value for weight

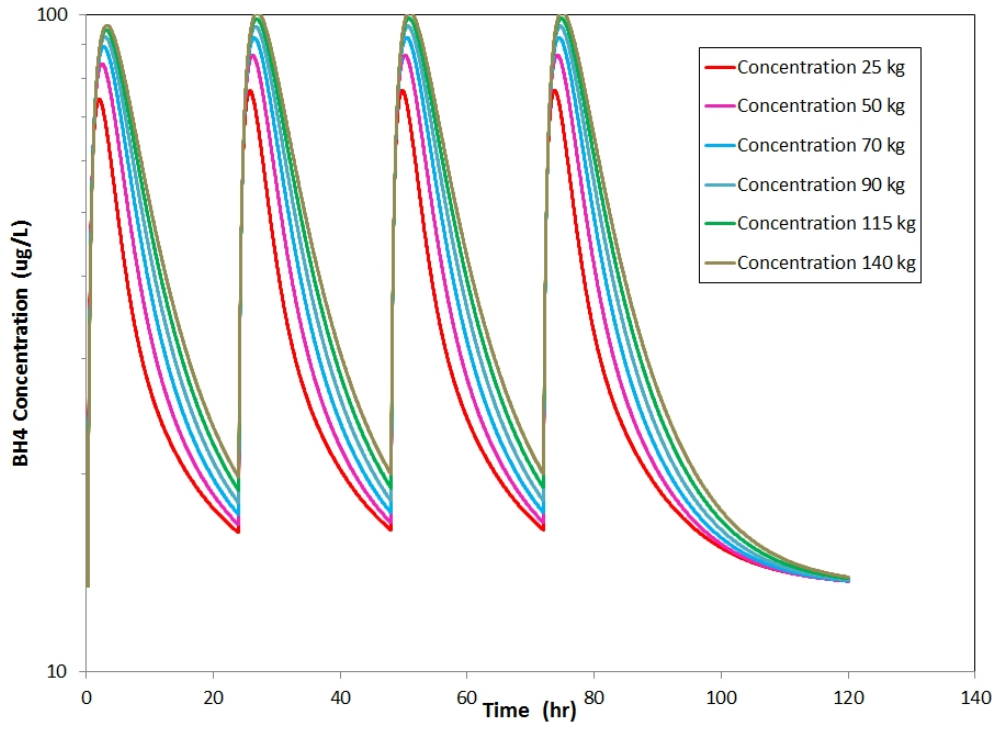

**Figure 4S.** Simulated Concentration Time Profiles Following Once Daily Dosing of 20 mg/kg.
